# Supplementary material
Source: ML conference proceedings conference paper supplement (https://openaccess.thecvf.com/content/CVPR2023/html/Park_Temporal_Interpolation_Is_CVPR_2023_paper.html)
Supplement: Supplementary file 2 [file Park_Temporal_Interpolation_Is_CVPR_2023_supplemental.zip]

Archive with 2 entries (2 files):
- supp_final.mp4
- 2023072380.pdf
